# Supplementary material for: Genome-wide association studies found CCDC7 and ITGB1 associated with diabetic retinopathy
Source: bioRxiv or medRxiv preprint supplement (doi:10.1101/2024.08.10.24311791), 2024-08-11

# MAGMA tissue expression analysis

GTEx v8 53 tissue types

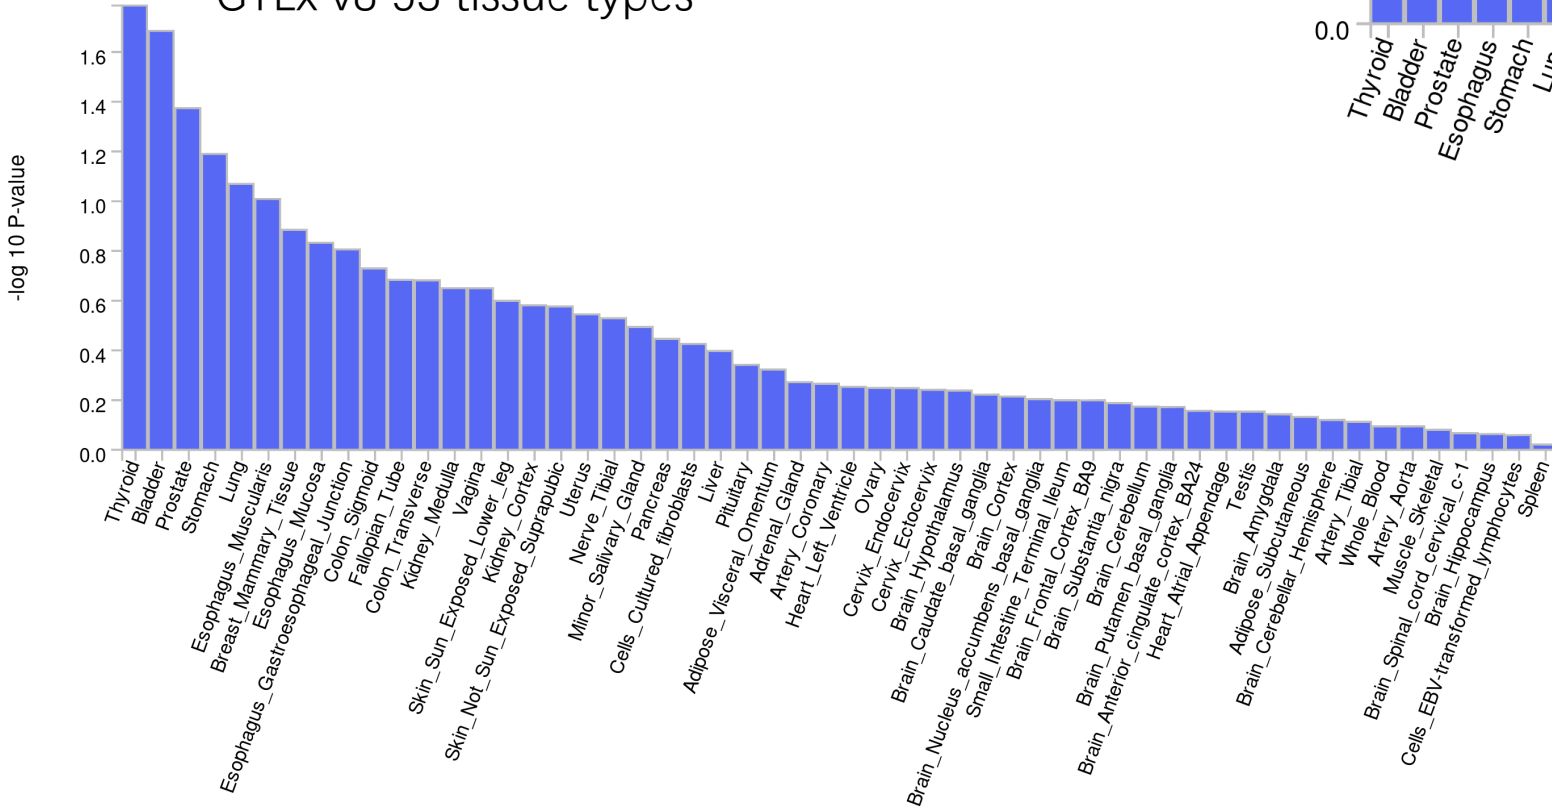

GTEx v8 30 general tissue types

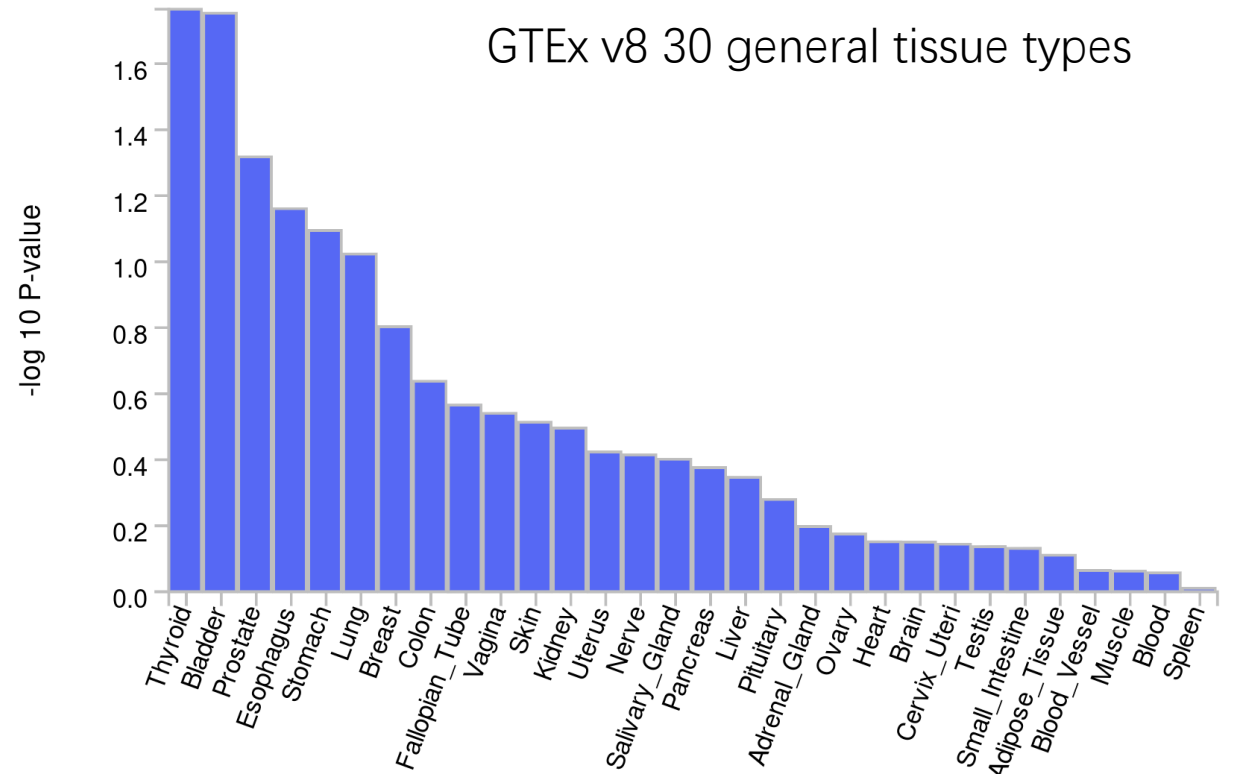

Supplement: Supplementary file [file media-3.pdf]
