# Supplementary material for: Genome-wide association studies found CCDC7 and ITGB1 associated with diabetic retinopathy
Source: bioRxiv or medRxiv preprint supplement (doi:10.1101/2024.08.10.24311791), 2024-08-11

### Positional gene sets (MsigDB c1)

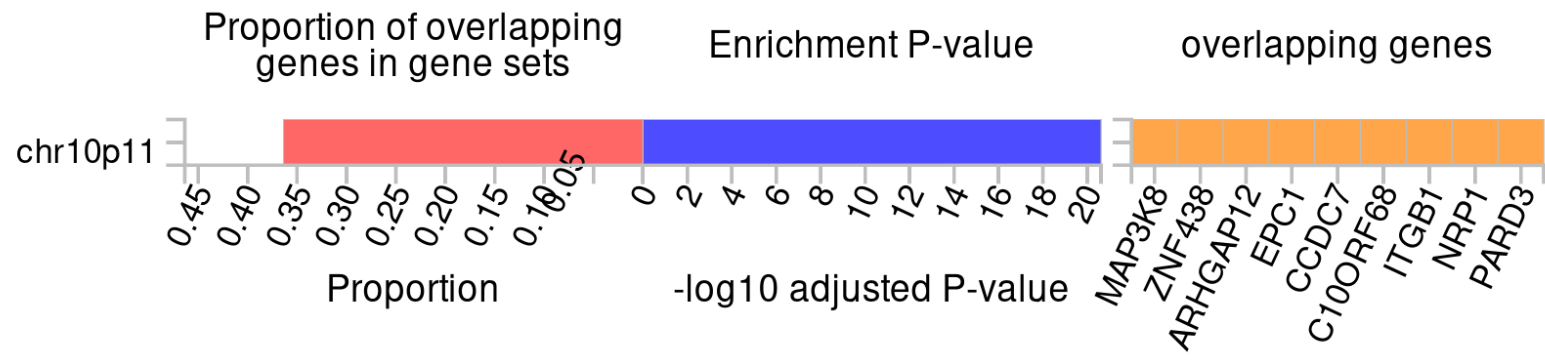

### Reactome (MsigDB c2)

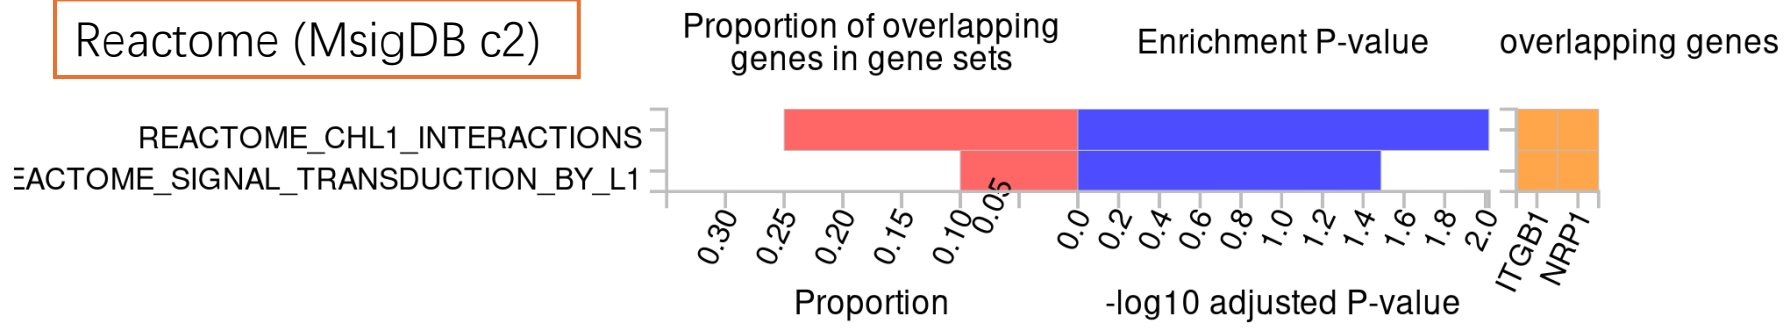

### GWAS catalog reported genes

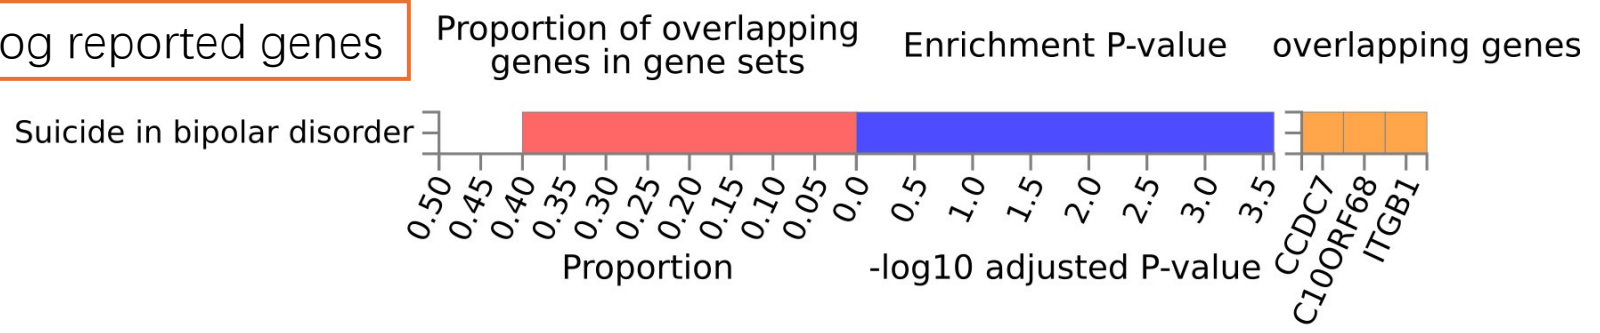

Supplement: Supplementary file [file media-5.pdf]
