# Supplementary material for: Genome-wide association studies found CCDC7 and ITGB1 associated with diabetic retinopathy
Source: bioRxiv or medRxiv preprint supplement (doi:10.1101/2024.08.10.24311791), 2024-08-11
Supplement: Supplementary file [file media-6.pdf]

# Human tissue compendium (Novartis)

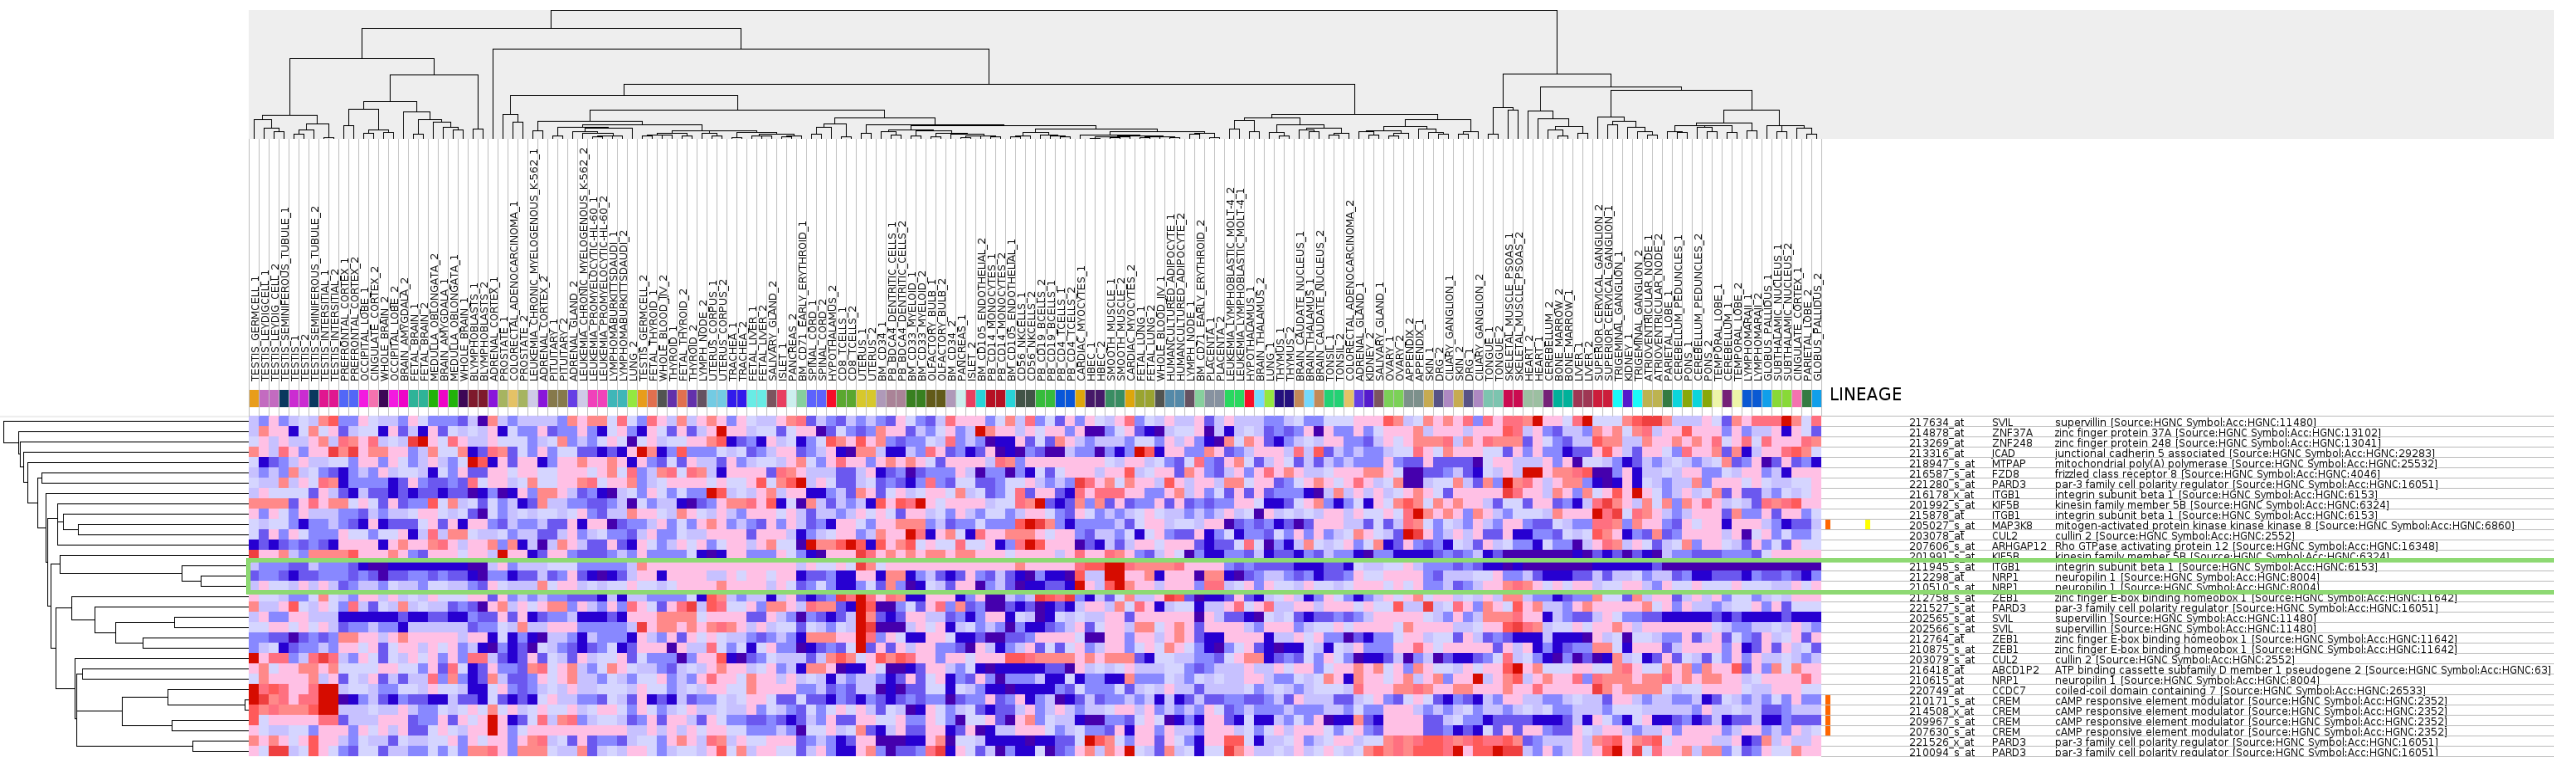

LINEAGE

|             |          |                                                                                          |
|-------------|----------|------------------------------------------------------------------------------------------|
| 217634_at   | SVIL     | supervillin [Source:HGNC Symbol;Acc:HGNC:11480]                                          |
| 214878_at   | ZNF37A   | zinc finger protein 37A [Source:HGNC Symbol;Acc:HGNC:13102]                              |
| 213269_at   | ZNF248   | zinc finger protein 248 [Source:HGNC Symbol;Acc:HGNC:13041]                              |
| 213316_at   | CAD      | junctional cadherin 5 associated [Source:HGNC Symbol;Acc:HGNC:29283]                     |
| 218947_s_at | MTPAP    | mitochondrial poly(A) polymerase [Source:HGNC Symbol;Acc:HGNC:25532]                     |
| 216587_s_at | FZD8     | fzd-like class receptor 8 [Source:HGNC Symbol;Acc:HGNC:4046]                             |
| 221280_s_at | PARD3    | par-3 family cell polarity regulator [Source:HGNC Symbol;Acc:HGNC:16051]                 |
| 216178_x_at | ITGB1    | integrin subunit beta 1 [Source:HGNC Symbol;Acc:HGNC:6153]                               |
| 201982_s_at | KIF5B    | kinesin family member 5B [Source:HGNC Symbol;Acc:HGNC:6324]                              |
| 215878_at   | ITGB1    | integrin subunit beta 1 [Source:HGNC Symbol;Acc:HGNC:6153]                               |
| 205027_s_at | MAP3K8   | mitogen-activated protein kinase kinase kinase 8 [Source:HGNC Symbol;Acc:HGNC:6860]      |
| 203078_at   | ARHGAP12 | Rho GTPase activating protein 12 [Source:HGNC Symbol;Acc:HGNC:16348]                     |
| 207606_s_at | KIF5B    | kinesin family member 5B [Source:HGNC Symbol;Acc:HGNC:6324]                              |
| 211945_s_at | ITGB1    | integrin subunit beta 1 [Source:HGNC Symbol;Acc:HGNC:6153]                               |
| 212298_at   | NRP1     | neuropilin 1 [Source:HGNC Symbol;Acc:HGNC:8004]                                          |
| 210510_s_at | NRP1     | neuropilin 1 [Source:HGNC Symbol;Acc:HGNC:8004]                                          |
| 212298_at   | ZEB1     | zinc finger E-box binding homeobox 1 [Source:HGNC Symbol;Acc:HGNC:11642]                 |
| 221527_s_at | PARD3    | par-3 family cell polarity regulator [Source:HGNC Symbol;Acc:HGNC:16051]                 |
| 202565_s_at | SVIL     | supervillin [Source:HGNC Symbol;Acc:HGNC:11480]                                          |
| 202566_s_at | SVIL     | supervillin [Source:HGNC Symbol;Acc:HGNC:11480]                                          |
| 212764_at   | ZEB1     | zinc finger E-box binding homeobox 1 [Source:HGNC Symbol;Acc:HGNC:11642]                 |
| 210875_s_at | ZEB1     | zinc finger E-box binding homeobox 1 [Source:HGNC Symbol;Acc:HGNC:11642]                 |
| 203078_at   | CUL2     | cullin 2 [Source:HGNC Symbol;Acc:HGNC:2552]                                              |
| 216418_at   | ABCD1P2  | ATP binding cassette subfamily D member 1 pseudogene 2 [Source:HGNC Symbol;Acc:HGNC:691] |
| 210615_at   | NRP1     | neuropilin 1 [Source:HGNC Symbol;Acc:HGNC:8004]                                          |
| 220749_at   | CCDC7    | coiled-coil domain containing 7 [Source:HGNC Symbol;Acc:HGNC:26533]                      |
| 210171_s_at | CREM     | cAMP responsive element modulator [Source:HGNC Symbol;Acc:HGNC:2352]                     |
| 214508_x_at | CREM     | cAMP responsive element modulator [Source:HGNC Symbol;Acc:HGNC:2352]                     |
| 209967_s_at | CREM     | cAMP responsive element modulator [Source:HGNC Symbol;Acc:HGNC:2352]                     |
| 207630_s_at | CREM     | cAMP responsive element modulator [Source:HGNC Symbol;Acc:HGNC:2352]                     |
| 215126_x_at | PARD3    | par-3 family cell polarity regulator [Source:HGNC Symbol;Acc:HGNC:16051]                 |
| 210094_s_at | PARD3    | par-3 family cell polarity regulator [Source:HGNC Symbol;Acc:HGNC:16051]                 |

kinases transcription factors
