# Supplementary material for: Genome-wide association studies found CCDC7 and ITGB1 associated with diabetic retinopathy
Source: bioRxiv or medRxiv preprint supplement (doi:10.1101/2024.08.10.24311791), 2024-08-11

Forest plot

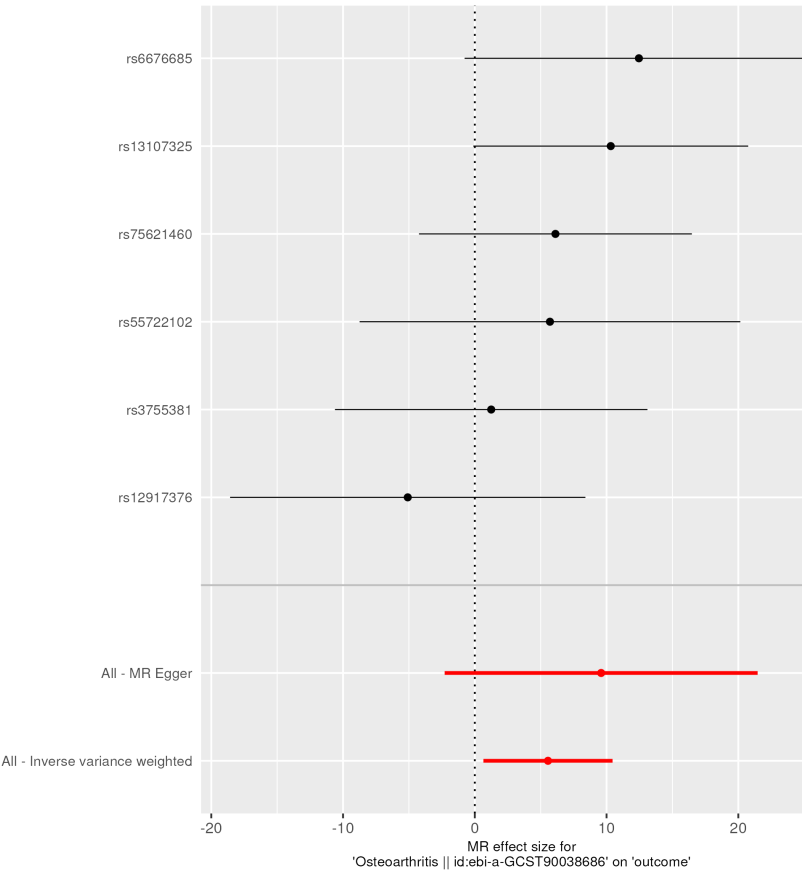

Funnel plot

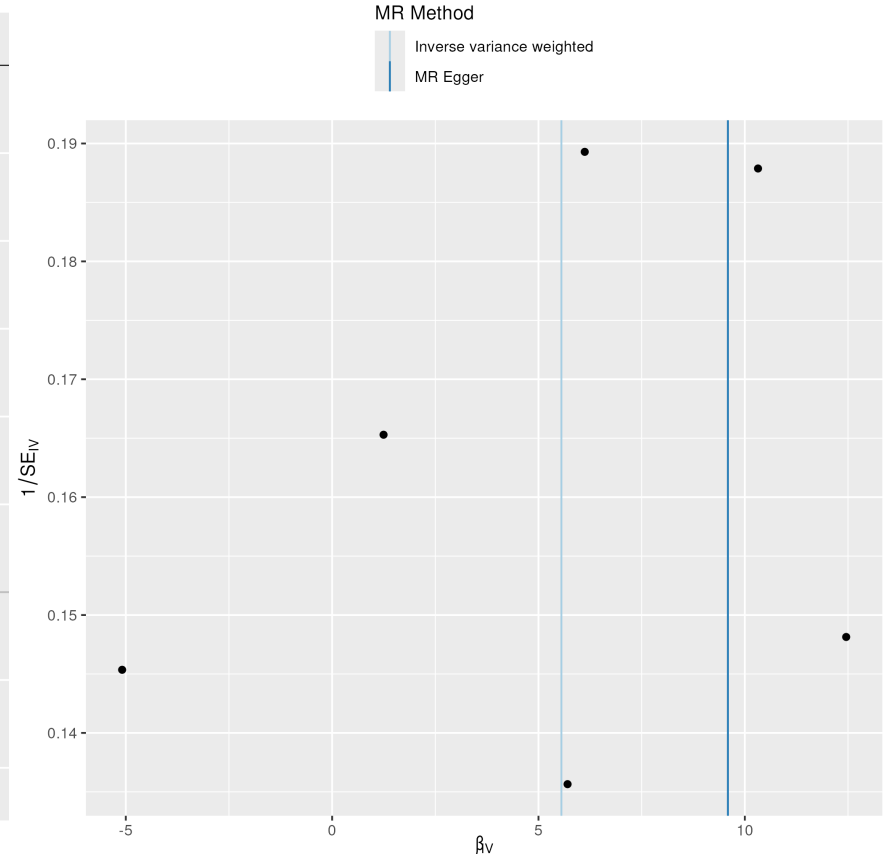

Leave-one-out plot

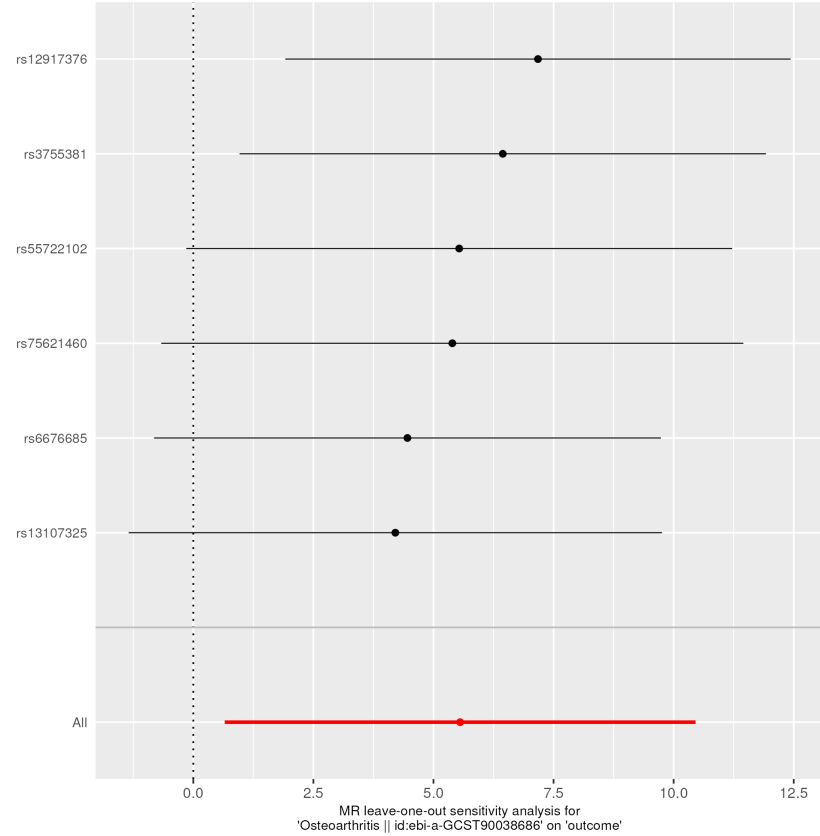

# Mendelian Randomization

Diabetic retinopathy (exposure),  
Osteoarthritis (outcome)

## MR\_results plot

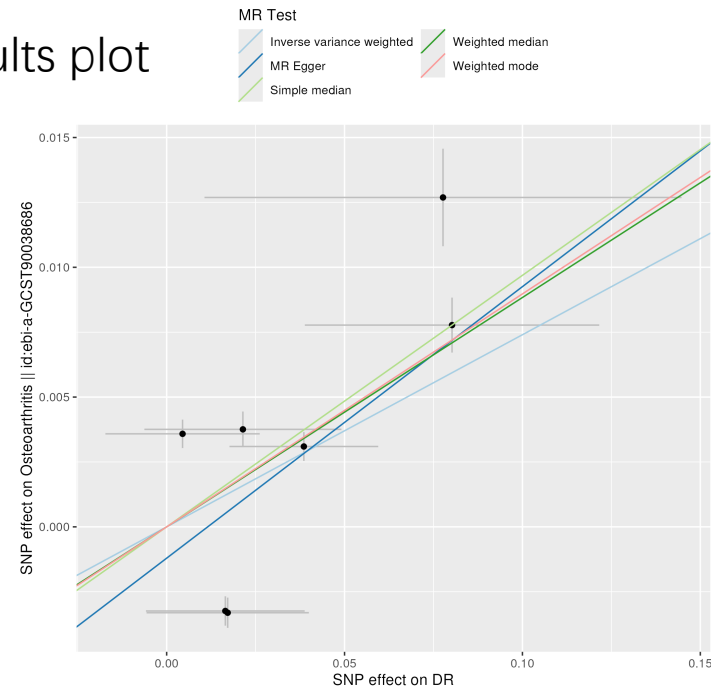

## Forest plot

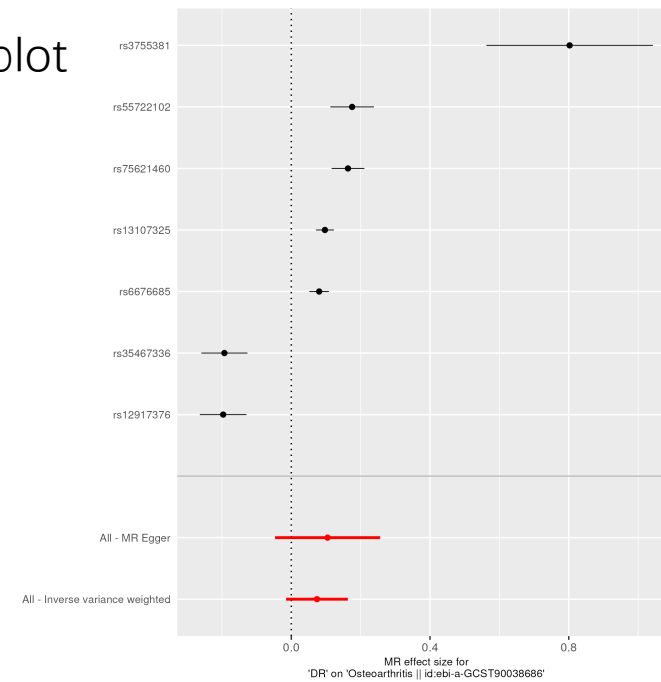

## Funnel plot

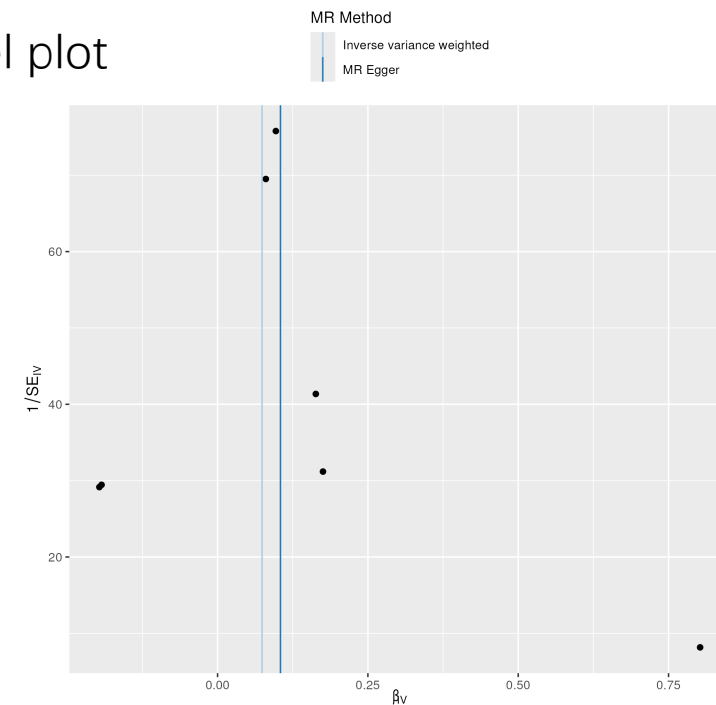

## Leave\_one\_out plot

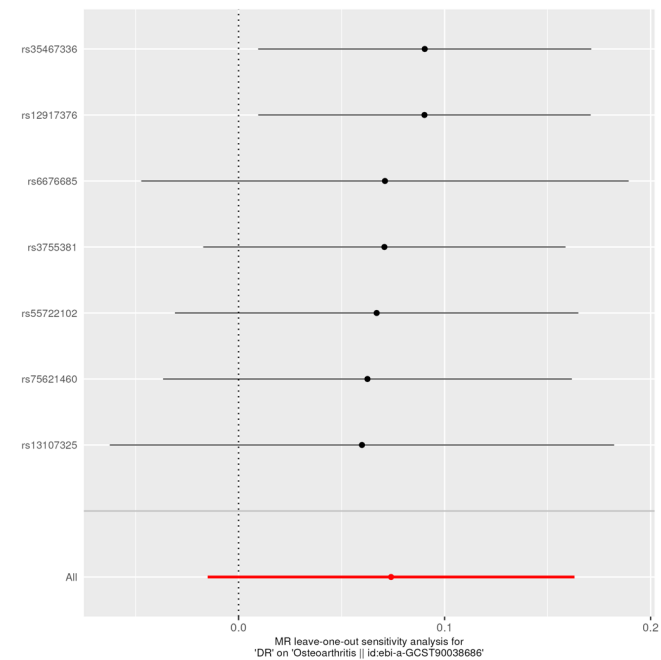

Supplement: Supplementary file [file media-8.pdf]
